# Supplementary material
Source: publisher site journal article supplement (https://www.oncotarget.com/article/28628)
Supplement: Supplementary file 1 [file 28628]

## Addendum

## Addendum: HER3- A key survival pathway and an emerging therapeutic target in metastatic colorectal cancer and pancreatic ductal adenocarcinoma

Omkar Desai<sup>1,2</sup> and Rui Wang<sup>1,2,3</sup>

<sup>1</sup>Department of Surgery, Case Western Reserve University, Cleveland, OH 44106, USA

<sup>2</sup>Case Comprehensive Cancer Center, Case Western Reserve University, Cleveland, OH 44106, USA

<sup>3</sup>Department of Surgery, Division of Surgical Oncology, University Hospitals Cleveland Medical Center, Cleveland, OH 44106, USA

**Published:**

**Copyright:** © 2024 Desai and Wang. This is an open access article distributed under the terms of the [Creative Commons Attribution License](#) (CC BY 4.0), which permits unrestricted use, distribution, and reproduction in any medium, provided the original author and source are credited.

**This article has an addendum:** This article received a publication fee waiver.

Original article: Oncotarget. 2023; 14:439–443. <https://doi.org/10.18632/oncotarget.28421>
